# Supplementary material for: Combinatorial Activation and Repression by Seven Transcription Factors Specify Drosophila Odorant Receptor Expression
Source: PLoS Biol. 2012 Mar 13;10(3):e1001280. doi: 10.1371/journal.pbio.1001280 (PMC3302810; doi:10.1371/journal.pbio.1001280)
Supplement: Table S2 — TF-IRs phenotypes for the 32 ORs in the regulatory matrix. Statistics related to Figure 3. OR expression detected by in situ hybridizations on TF-IRs antennas and rated per animal from; 0 (loss) to 5 (control levels) and denoted as phenotype level/animals. OR expression rated above 2 was considered to be wild-type variance. (XLS) [file pbio.1001280.s006.xls]

## Sheet: Sheet1
		at1		at2			at3				at4				ab1					ab2			ab3			ab4			ab5			ab6		ab7			ab8			ab9			ab10
		67d		83c	23a		2a	43a	19a		88a	65a	47b		Gr21a	42b	10a	92a		59b	85a		22a/b	85b		7a	56a		82a	47a		49b		98a	67c		9a	43b		69a	67b		67a	49a	85f		13a
acj6-IR		5/12		5/12	5/12		0/12	5/12	2/14		5/12	N/A	5		5/16	0/16	5/10 2/8	0		1/16	0/16		5/14	1/8 5/8 3/5		0/16	0/16		0/16	1/16		3/6 5/8		0/10	5/11		5/15	0/15		N/A	0/15		5/15		2/14		0/9 5/5
E93-IR		5/12		0/12	5/10		0/14	0/12	5/ 9		5/12	N/A	0		5/15	5/16	5/10	5		5/12	5/13		5/15	5/10		5/15	5/15		0/7 1/11 5/5	5/10		5/12		5/15	5/12		5/10	5/10		N/A	5/12		2/16		5/11		5/5
Fer1-IR		5/12		5/10	0/5 2/4		0/6 2/10	5/16	5/12		2/12	N/A	5		5/12	0/16	0/16 5/12	0		1/6 3/6 2/6 5/4	5/12		0/12 2/3 5/5	5/16		5/14	0/12		5/12	5/12		5/10		5/12	5/11		2/12 1/8 5/4	5/10		N/A	5/12		5/10		5/8 0/10		0/8 2/6
onecut -IR		N/A		5/10	5/18		5/16	5/16	0/ 16		5/8	N/A	5		0/8, 2/6	5/12	0/8	0		5/10	5/12		0/6 1/13	5/8		5/8	5/10		N/A	5/12		5/9		5/12	5/12		5/2	5/15		N/A	2/14		2/6 0/4		5/13		5/6
sm-IR		5/16		5/11	5/12		5/12	5/14	0/9		5/11	N/A	5		5/13	0/16	5/11	0		5/18	5/15		5/12	5/12		5/14	0/14		5/9	0/5 3/3 5/5		0/9		5/10	5/14		5/15	5/18		N/A	1/13		0/15		5/8		0/4 1/6 2/4 5/4
xbp1-IR		5/10		5/14	0/12 2/6		5/10	5/15	5/12		5/16	N/A	5		5/16	0/16	5/9	0		5/18	5/12		2/10 5/2	3/5 5/12		1/6 2/4 5/4	5/12		5/14	5/13		5/13		5/10	0/8 2/2 5/12		5/14	5/10		N/A	5/10		2/5 1/7		2/8 3/6		0/8 1/7
zf30c-IR		2/12		5/10	5/14		5/10	5/12	5/10		5/12	N/A	5		5/12	5/12	5/9	0		5/10	5/18		5/10	2/12		5/10	0/12		5/14	5/15		5/12		5/12	5/13		5/13	0/4 2/8		N/A	5/10		0/8 1/7		5/12		5/10
[truncated: 1 more columns]
